# Supplementary material for: Body mass index and physical activity in early childhood are associated with atopic sensitization, atopic dermatitis and asthma in later childhood
Source: Springer Nature journal article supplement (doi:10.1186/s13601-016-0124-9), 2016-08-22

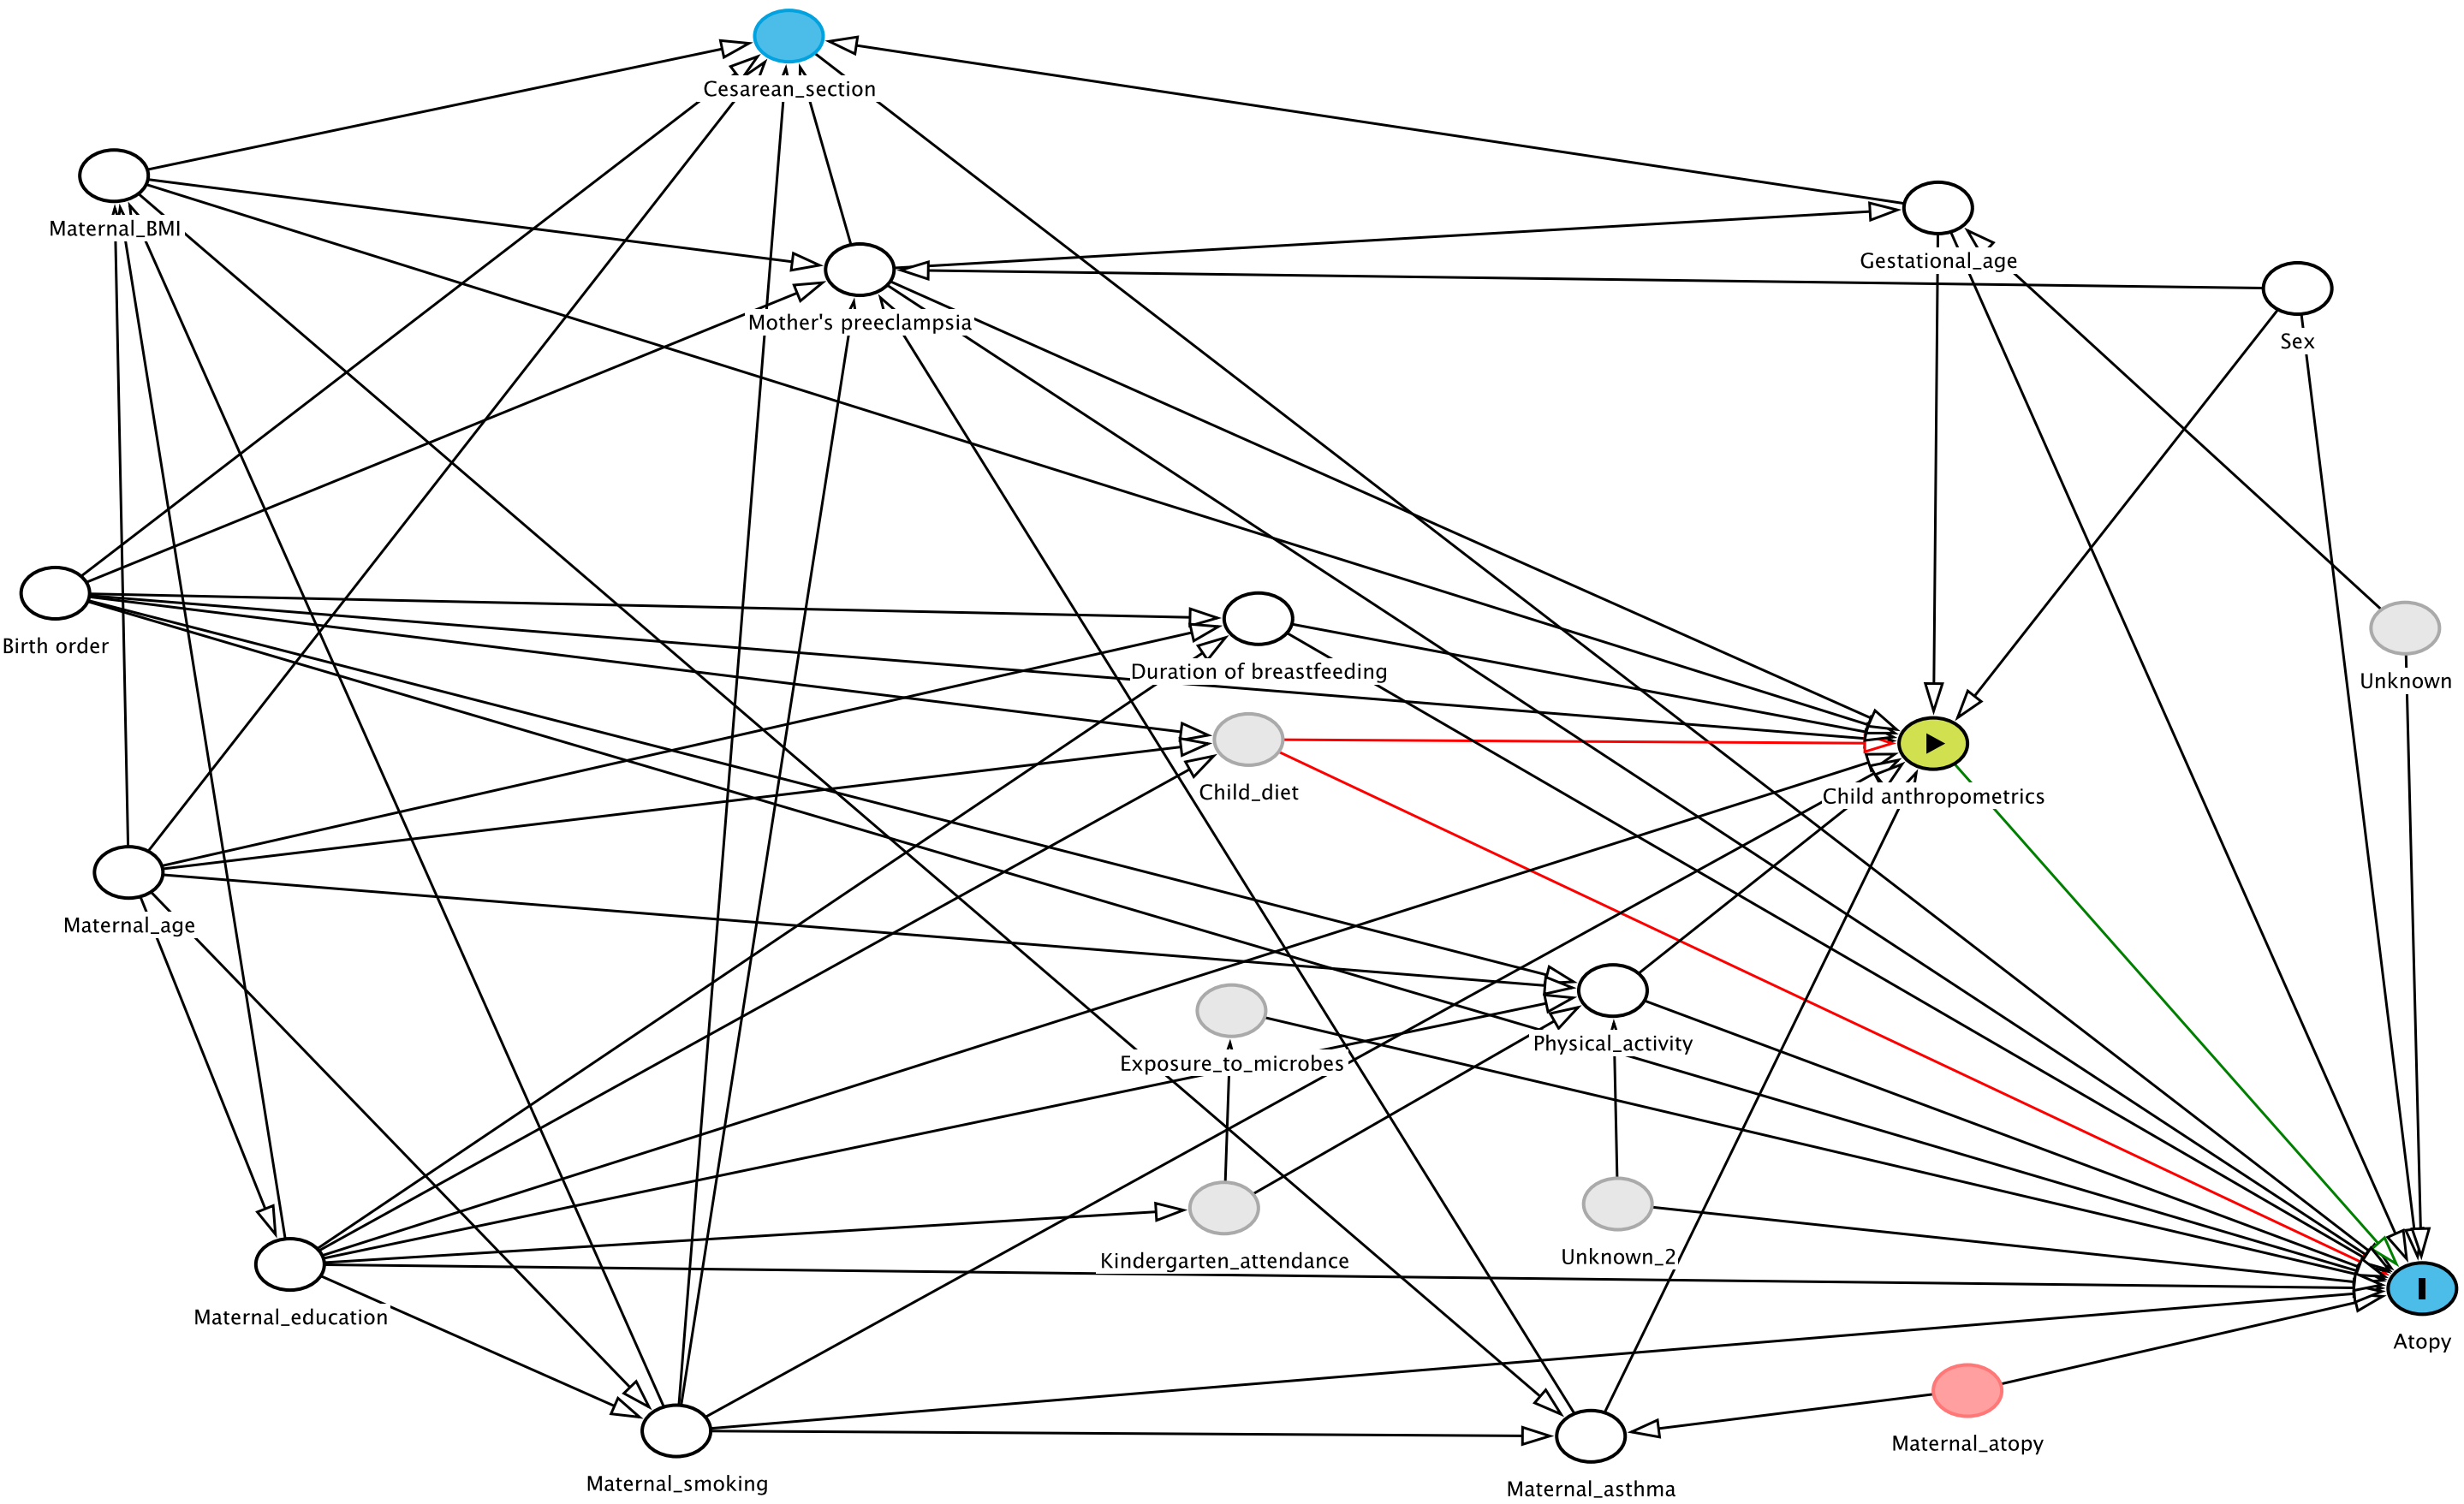

Supplement: MOESM1 [file 13601_2016_124_MOESM1_ESM.pdf]
